# Supplementary material
Source: bioRxiv or medRxiv preprint supplement (https://www.biorxiv.org/highwire/filestream/115354/field_highwire_adjunct_files/7/380311-2.pdf)
Supplement: Supplementary file [file 380311-2.pdf]

| 238/1045 proteins |                 | Injected/Control |          |          |    | Pept used | Total Peptides | MW (kDa)                                                                                                                     | Description      | Species |
|-------------------|-----------------|------------------|----------|----------|----|-----------|----------------|------------------------------------------------------------------------------------------------------------------------------|------------------|---------|
| proteins          | Gene & Synonyms | ratio            | Log2     | p-value  |    |           |                |                                                                                                                              |                  |         |
| Q6P972            | tuba2           | 1000             | 1000     |          | 9  | 9         | 50.0           | Tubulin alpha chain                                                                                                          | Danio rerio      |         |
| Q5T255            | ezb2 (ECO)      | 1000             | 1000     |          | 8  | 8         | 68.7           | Ezrin                                                                                                                        | Danio rerio      |         |
| ETFA45            | micall1a        | 1000             | 1000     |          | 6  | 6         | 96.1           | MICAL-like 1a                                                                                                                | Danio rerio      |         |
| Q6Q0H1            | atp1b3a         | 1000             | 1000     |          | 6  | 6         | 32.0           | Adenosine triphosphatase ATPase subunit beta                                                                                 | Danio rerio      |         |
| ACE2E1            | ee122 (ECO)     | 1000             | 1000     |          | 4  | 4         | 95.9           | Eukaryotic translation elongation factor 2-like 2                                                                            | Danio rerio      |         |
| A4FULM6           | atp6v1b2        | 1000             | 1000     |          | 4  | 4         | 56.5           | ATPase H+ transporting, lysosomal V1 subunit B2                                                                              | Danio rerio      |         |
| AOA0R4IHG0        | cyb             | 1000             | 1000     |          | 3  | 3         | 54.0           | Solute carrier family 16, member 6a                                                                                          | Danio rerio      |         |
| AOA0R4IW71        | cyb             | 1000             | 1000     |          | 3  | 3         | 88.9           | Elastin microfibril interfacer 2b                                                                                            | Danio rerio      |         |
| A2BENB            | si.ch211.14.1   | 1000             | 1000     |          | 3  | 3         | 20.7           | Si.ch211-10724_10                                                                                                            | Danio rerio      |         |
| A2CEJ3            | spbh2b (EC)     | 1000             | 1000     |          | 3  | 3         | 110.8          | Spbh receptor 62b                                                                                                            | Danio rerio      |         |
| ARW00             | slamf2          | 1000             | 1000     |          | 3  | 3         | 55.6           | Signal transducing adaptor molecule (SH3 domain and ITAM motif) 2                                                            | Danio rerio      |         |
| F1Q9G1            | sv2ba           | 1000             | 1000     |          | 3  | 3         | 78.5           | SubName: Full=Synaptic vesicle glycoprotein 2Ba (ECO:0000313)Ensembl:ENSADRP00000106886                                      | Danio rerio      |         |
| F1Q9R3            | paln3           | 1000             | 1000     |          | 3  | 3         | 47.5           | Paralamin 3                                                                                                                  | Danio rerio      |         |
| F1Q9E6            | lsp101a (E)     | 1000             | 1000     |          | 3  | 3         | 44.1           | Tumor susceptibility 101a                                                                                                    | Danio rerio      |         |
| F1Q2Q0            | ftcd            | 1000             | 1000     |          | 3  | 3         | 60.4           | Fomimidoyltransferase cyclodeaminase (Fragment)                                                                              | Danio rerio      |         |
| Q586B9            | lfp2b.CH2       | 1000             | 1000     |          | 3  | 3         | 24.1           | Lipoma HMG3 fusion partner-like 2b                                                                                           | Danio rerio      |         |
| Q6PFL4            | cdc42 (ECO)     | 1000             | 1000     |          | 3  | 3         | 21.3           | Cell division cycle 42                                                                                                       | Danio rerio      |         |
| Q8Q3J6            | sdcbp2 (EC)     | 1000             | 1000     |          | 3  | 3         | 32.4           | Sdcbp protein                                                                                                                | Danio rerio      |         |
| Q9PRH9            | fabp2.FA6       | 1000             | 1000     |          | 3  | 3         | 15.1           | Fabp2 protein                                                                                                                | Danio rerio      |         |
| Q9U6Y5            | 47.89616        | 5.581838         | 7.35E-06 |          | 34 | 34        | 28.1           | SWISS-PROT:Q9U6Y5 Green fluorescent protein (GFP-Cter-His Tag)                                                               | Zoanthus sp.     |         |
| B8JLR1            | pdcd8ip (E)     | 34.64554         | 5.114723 | 5.37E-10 | 37 | 42        | 85.8           | Programmed cell death 8-interacting protein                                                                                  | Danio rerio      |         |
| Q4V920            | pacscn1b.1      | 26.33527         | 4.718924 | 0.006642 | 8  | 8         | 51.4           | Protein kinase C and casein kinase substrate in neurons protein 1                                                            | Danio rerio      |         |
| Q8Q0C8            | zgc:153011      | 13.57107         | 3.762462 | 0.0591   | 7  | 7         | 27.6           | Zgc:153018                                                                                                                   | Danio rerio      |         |
| Q5RG12            | hsp90aa1.1      | 10.34728         | 3.371179 | 0.246482 | 4  | 4         | 84.7           | Heat shock protein 90, alpha (cytosolic), class A member 1, tandem duplicate 2                                               | Danio rerio      |         |
| Q6P3M0            | slc30a1a (E)    | 9.688034         | 3.276204 | 0.013979 | 6  | 6         | 53.9           | Solute carrier family 30 (zinc transporter), member 1                                                                        | Danio rerio      |         |
| Q6D9M9            | smc1a1.smc      | 9.248489         | 3.209218 | 0.107496 | 8  | 8         | 143.1          | Structural maintenance of chromosomes protein                                                                                | Danio rerio      |         |
| F1Q983            | hpsmat          | 9.147191         | 3.193329 | 0.000492 | 10 | 10        | 72.7           | Heparan-alpha-L-glucosaminide N-acetyltransferase                                                                            | Danio rerio      |         |
| Q1Q173            | prkar2a         | 8.224121         | 3.142116 | 0.000117 | 5  | 5         | 25.2           | Changed multimeric body protein 4c                                                                                           | Danio rerio      |         |
| AGC3T0            | prkar2aa        | 8.863802         | 3.164079 | 1.99E-08 | 17 | 17        | 44.7           | Protein kinase, cAMP-dependent, regulatory, type II, alpha A                                                                 | Danio rerio      |         |
| Q6H6W2            | ehd1b (E)       | 8.564853         | 3.098429 | 4.13E-06 | 29 | 29        | 60.0           | EH-domain containing 1                                                                                                       | Danio rerio      |         |
| F1RCV0            | abcc2           | 6.953638         | 2.797768 | 0.004592 | 14 | 14        | 174.0          | ATP-binding cassette, sub-family C (CFTR/MRP), member 2 (Fragment)                                                           | Danio rerio      |         |
| F1Q9D2            | cpn3            | 6.938865         | 2.7947   | 0.009034 | 16 | 16        | 59.9           | SubName: Full=Copine III (ECO:0000313)Ensembl:ENSADRP00000139825                                                             | Danio rerio      |         |
| Q8N9X8            | st13            | 6.514146         | 2.703576 | 0.000971 | 9  | 9         | 39.9           | ST13, Hsp70-interacting protein                                                                                              | Danio rerio      |         |
| ETXK06            | slc7a8b.a1      | 6.377338         | 2.672914 | 0.002259 | 23 | 29        | 57.3           | Solute carrier family 7 (amino acid transporter/light chain, L system), member 8a                                            | Danio rerio      |         |
| AA02G2XK16        | h               | 6.138844         | 2.618202 | 0.068844 | 5  | 5         | 71.4           | Dynamin 2b                                                                                                                   | Danio rerio      |         |
| Q6PG05            | hfg             | 5.587586         | 2.482225 | 0.079884 | 6  | 6         | 42.3           | TfII protein                                                                                                                 | Danio rerio      |         |
| Q6PW55            | rpe65a.rpe      | 5.371721         | 2.425384 | 0.009497 | 17 | 27        | 60.8           | Retinoid isomerase/hydrolase                                                                                                 | Danio rerio      |         |
| Q6Y811            | ehd1a (EC)      | 5.116874         | 2.355263 | 1.18E-06 | 35 | 35        | 60.2           | EH-domain-containing 1a                                                                                                      | Danio rerio      |         |
| B0SSU0            | palc2           | 5.070243         | 2.342055 | 0.03061  | 6  | 6         | 33.3           | PQ loop repeat-containing 2                                                                                                  | Danio rerio      |         |
| Q2T1K0            | rho27c (ECO)    | 5.063455         | 2.340122 | 0.003557 | 13 | 13        | 271.3          | Cation-dependent mannose 6-phosphate receptor                                                                                | Danio rerio      |         |
| P33359            | rho26a2         | 4.830891         | 2.301846 | 0.019248 | 15 | 15        | 39.7           | Rhodopsin                                                                                                                    | Danio rerio      |         |
| F1R314            | zgc:110425      | 4.897796         | 2.292133 | 0.070777 | 6  | 6         | 20.2           | Zgc:110425                                                                                                                   | Danio rerio      |         |
| AOA0R4JBE6        | cyb             | 4.439221         | 2.150307 | 0.283406 | 5  | 5         | 274.4          | Pre-mRNA-processing factor 8                                                                                                 | Danio rerio      |         |
| Q6DFZ5            | slc22a3a (E)    | 4.422795         | 2.144958 | 0.197797 | 8  | 8         | 58.6           | Solute carrier family 22 (facilitated glucose transporter), member 3a                                                        | Danio rerio      |         |
| F1RBH4            | slc12           | 4.415908         | 2.142711 | 0.405825 | 8  | 8         | 96.2           | SID1 transmembrane family, member 2                                                                                          | Danio rerio      |         |
| B0UXS0            | hmox1a.hm       | 4.357554         | 2.123519 | 0.0591   | 5  | 5         | 30.4           | Heme oxygenase 1a                                                                                                            | Danio rerio      |         |
| AOA0R4ISK5        | cyb             | 4.198538         | 2.0692   | 0.0867   | 5  | 5         | 191.2          | ATP-binding cassette, sub-family A (ABC1), member 3b                                                                         | Danio rerio      |         |
| Q6P219            | cd63 (ECO)      | 4.13062          | 2.046358 | 0.146835 | 6  | 6         | 25.8           | Tetraspanin                                                                                                                  | Danio rerio      |         |
| AOA0R4IWE1        | cyb             | 4.050743         | 2.018186 | 0.063117 | 5  | 5         | 32.0           | Fumarylacetoacetate hydrolase domain-containing 2A                                                                           | Danio rerio      |         |
| Q7ZV08            | scamp2          | 4.035525         | 2.012756 | 0.061102 | 5  | 5         | 36.0           | Secretory carrier-associated membrane protein                                                                                | Danio rerio      |         |
| F1QW87            | cdc114          | 3.926966         | 1.973415 | 0.365075 | 5  | 5         | 66.4           | Coiled-coil domain-containing 114                                                                                            | Danio rerio      |         |
| Q8Q3W0            | ddx39ab.d       | 3.921304         | 1.971333 | 0.460108 | 8  | 8         | 48.9           | DEAD (Asp-Glu-Ala-Asp) box polypeptide 39Ab                                                                                  | Danio rerio      |         |
| AK3PK3            | hsh111          | 3.815732         | 1.911336 | 0.095707 | 6  | 6         | 20.7           | Histone H1-like                                                                                                              | Danio rerio      |         |
| F1RAX4            | stra6           | 3.738811         | 1.902579 | 0.000277 | 39 | 39        | 75.4           | Stimulated by retinoic acid 6                                                                                                | Danio rerio      |         |
| ET6F22            | sv2a            | 3.684952         | 1.881646 | 0.00285  | 10 | 10        | 83.5           | Synaptic vesicle glycoprotein 2A                                                                                             | Danio rerio      |         |
| F1QNF8            | ugt5b2.ugt      | 3.678675         | 1.878401 | 0.311379 | 6  | 6         | 60.7           | UDP glucuronosyltransferase 5 family, polypeptide B1                                                                         | Danio rerio      |         |
| Q0K1Z7            | kon13.K17       | 3.640308         | 1.864061 | 0.091751 | 6  | 6         | 40.6           | Inwardly rectifying potassium channel 7.1                                                                                    | Danio rerio      |         |
| F1QD46            | act1b           | 3.528358         | 1.818997 | 0.068844 | 6  | 6         | 77.7           | Act-CaA synthetase long-chain family member 1b                                                                               | Danio rerio      |         |
| B0R026            | pmt5.C14        | 3.449405         | 1.768347 | 0.284636 | 6  | 6         | 71.9           | RecName: Full=Protein arginine N-methyltransferase 5 (ECO:0000256)PIRNR:PIRNR015894; EC=2.1.1 (ECO:0000256)PIRNR:PIRNR015894 | Danio rerio      |         |
| B5DD24            | acta1.dpo4      | 3.395042         | 1.76343  | 0.068844 | 12 | 12        | 84.7           | Acta1 protein                                                                                                                | Danio rerio      |         |
| Q7W040            | mat1a           | 3.353615         | 1.745717 | 0.111794 | 6  | 6         | 43.3           | S-adenosylmethionine synthase                                                                                                | Danio rerio      |         |
| F1QOE8            | m167            | 3.341055         | 1.740304 | 0.131813 | 5  | 5         | 44.2           | Ring finger protein 167                                                                                                      | Danio rerio      |         |
| I3ITN9            | aldh1f1         | 3.28427          | 1.715573 | 0.234972 | 6  | 6         | 100.2          | 10-formyltetrahydrofolate dehydrogenase                                                                                      | Danio rerio      |         |
| ETP291            | camp            | 3.159101         | 1.659514 | 0.727292 | 3  | 3         | 123.6          | Cell migration-inducing protein, hyaluronan-binding (Fragment)                                                               | Danio rerio      |         |
| F1Q0C5            | slc27a2a.s      | 3.141196         | 1.647615 | 0.076116 | 24 | 24        | 69.0           | Solute carrier family 27 (fatty acid transporter), member 2a                                                                 | Danio rerio      |         |
| Q58RH0            | parp1           | 3.123111         | 1.642984 | 0.122546 | 14 | 19        | 112.8          | Poly (ADP-ribose) polymerase                                                                                                 | Danio rerio      |         |
| AOA0G2KW99        | asna1.std1      | 3.108599         | 1.636265 | 0.455755 | 4  | 4         | 0.0            | no description                                                                                                               | Unknown organism |         |
| Q6IQE5            | asna1           | 3.072539         | 1.619431 | 0.405906 | 5  | 5         | 38.3           | ATPase asna1                                                                                                                 | Danio rerio      |         |
| B0UYN4            | zgc:162944      | 3.03083          | 1.599713 | 0.167438 | 5  | 5         | 24.1           | Zgc:162944                                                                                                                   | Danio rerio      |         |
| ETP123            | BX005410        | 2.989814         | 1.570275 | 0.094964 | 16 | 16        | 109.4          | Aminopeptidase                                                                                                               | Danio rerio      |         |
| Q8UJY2            | sun60b.pan      | 2.989355         | 1.569996 | 0.033617 | 8  | 13        | 198.2          | Transcription elongation factor SPT6                                                                                         | Danio rerio      |         |
| F1QHF2            | si.ch217177     | 2.95086          | 1.561038 | 0.170018 | 4  | 4         | 41.1           | Mitogen-activated protein kinase                                                                                             | Danio rerio      |         |
| F1Q5P6            | rfc1            | 2.864584         | 1.518326 | 0.123661 | 5  | 5         | 125.4          | Replication factor C (activator 1) 1                                                                                         | Danio rerio      |         |
| Q7T3D3            | gna11 (ECO)     | 2.806124         | 1.488579 | 0.170888 | 12 | 12        | 40.3           | Guanine nucleotide-binding protein (G protein), alpha-inhibiting activity polypeptide 1                                      | Danio rerio      |         |
| AOA0G2L9M2        | zgc:1278531     | 2.78531          | 1.477838 | 0.211585 | 10 | 10        | 67.2           | Amino acid transporter                                                                                                       | Danio rerio      |         |
| Q8Q3J3            | rab2a           | 2.779138         | 1.474637 | 0.090304 | 18 | 23        | 23.5           | RAB2A, member RAS oncogene family                                                                                            | Danio rerio      |         |
| Q7T070            | mbp.sd.aka      | 2.7546           | 1.461843 | 0.546171 | 12 | 12        | 50.1           | Ammonium transporter Rh type B                                                                                               | Danio rerio      |         |
| F1Q112            | si.ch21939      | 2.746276         | 1.457477 | 0.123661 | 4  | 4         | 106.3          | Si.ch21939.12.3                                                                                                              | Danio rerio      |         |
| F1R3F0            | zgc:158422      | 2.711519         | 1.439101 | 0.124699 | 10 | 10        | 53.4           | Zgc:158423                                                                                                                   | Danio rerio      |         |
| HWEE64            | znf1044.sl      | 2.674492         | 1.419265 | 0.641516 | 4  | 4         | 45.3           | Uncharacterized protein                                                                                                      | Danio rerio      |         |
| Q5UJ55            | slc6a1b.als     | 2.635171         | 1.397897 | 0.527263 | 5  | 5         | 67.1           | Transporter                                                                                                                  | Danio rerio      |         |
| Q8TH32            | chl1 (ECO)      | 2.567336         | 1.360272 | 0.422496 | 18 | 18        | 18.8           | Cofilin 1                                                                                                                    | Danio rerio      |         |
| Q8PE34            | zgc:65894       | 2.537011         | 1.354459 | 0.451588 | 8  | 8         | 49.6           | Tubulin beta chain                                                                                                           | Danio rerio      |         |
| F1R2W0            | ansx1b          | 2.5301           | 1.331935 | 0.260092 | 6  | 6         | 51.5           | Annxin 6                                                                                                                     | Danio rerio      |         |
| F1Q172            | dhx16           | 2.525351         | 1.336844 | 0.537318 | 5  | 5         | 121.6          | DEAH (Asp-Glu-Ala-His) box polypeptide 16                                                                                    | Danio rerio      |         |
| Q5PR98            | ndrg2.zgc       | 2.49988          | 1.321859 | 0.379944 | 10 | 10        | 40.5           | Protein NDRG2                                                                                                                | Danio rerio      |         |
| Q6TH07            | flot1b (ECO)    | 2.473013         | 1.30627  | 1.76E-05 | 89 | 95        | 47.2           | Flotillin 1                                                                                                                  | Danio rerio      |         |
| Q5Q3V2            | apoaa.zgc       | 2.458038         | 1.297507 | 0.070777 | 34 | 34        | 32.0           | Apolipoprotein Ea                                                                                                            | Danio rerio      |         |
| Q8P3H8            | slc32a2 (E)     | 2.455503         | 1.296019 | 0.000702 | 53 | 59        | 56.0           | Solute carrier family 3 (amino acid transporter heavy chain), member 2b                                                      | Danio rerio      |         |
| Q8I9E5            | snmp            | 2.335502         | 1.223733 | 0.592638 | 4  | 4         | 24.5           | Small nuclear ribonucleoprotein-associated protein                                                                           | Danio rerio      |         |
| A2BHM7            | slc9a1e1a       | 2.292144         | 1.186908 | 0.444173 | 5  | 5         | 37.8           | Monosaccharyl O-acetyltransferase 3b                                                                                         | Danio rerio      |         |
| AOA0G2L9F7        | zgc:1274713     | 2.274713         | 1.185685 | 0.204786 | 5  | 5         | 91.0           | Strawberry notch homolog 1 (Drosophila)                                                                                      | Danio rerio      |         |
| Q6PD99            | marcks1a        | 2.22981          | 1.156921 | 0.197797 | 9  | 9         | 22.1           | MARCKS-like 1                                                                                                                | Danio rerio      |         |
| Q5T2Z7            | sv11a           | 2.200415         | 1.137775 | 0.123661 | 6  | 6         | 47.4           | Synaptotagmin 1                                                                                                              | Danio rerio      |         |
| Q7ZV85            | snrp31          | 2.19101          | 1.131596 | 0.49392  | 6  | 6         | 14.0           | Small nuclear ribonucleoprotein D3 polypeptide-like                                                                          | Danio rerio      |         |
| B8JKK6            | pbpa (ECO)      | 2.185358         | 1.12787  | 0.453403 | 6  | 6         | 17.4           | Preplyl-prolyl cis-trans isomerase                                                                                           | Danio rerio      |         |
| ASPM17            | slk12           | 2.1727           | 1.119489 | 0.405906 | 4  | 4         | 30.0           | Syntaxin 12                                                                                                                  | Danio rerio      |         |
| F1Q1V7            | gans (ECO)      | 2.146374         | 1.101902 | 0.094964 | 6  | 6         | 78.3           | Glycyl-tRNA synthetase                                                                                                       | Danio rerio      |         |
| Q6P2U5            | arf6a (ECO)     | 2.138324         | 1.09648  | 0.146835 | 10 | 10        | 20.1           | ADP-ribosylation factor 6a                                                                                                   | Danio rerio      |         |
| F1Q6P4            | cd82a           | 2.100767         | 1.070916 | 0.032339 | 6  | 6         | 28.6           | Tetraspanin                                                                                                                  | Danio rerio      |         |
| F6PEJ8            | si.ch211.74     | 2.096504         | 1.067986 | 0.070777 | 6  | 6         | 35.8           | Si.ch211-74m13.1                                                                                                             | Danio rerio      |         |
| Q5SNR2            | slc35b6         | 2.092417         | 1.05517  | 0.067564 | 6  | 6         | 41.2           | Solute carrier family 35, member F6                                                                                          | Danio rerio      |         |
| ETFE19            | snp (ECO)       | 2.092194         | 1.05017  | 0.107552 | 31 | 31        | 46.5           | 2'-3'-cyclic nucleotide 3' phosphodiesterase                                                                                 | Danio rerio      |         |
